# Supplementary material
Source: PubMed Central journal article supplement (PMC8020510)
Supplement: Supp_Table1.pdf [file Supp_Table1.pdf]

SUPPLEMENTARY TABLE S1. COMPARISON OF END-OF-LIFE OUTCOMES AMONG PATIENTS RECEIVING “LATE”  
PALLIATIVE CARE SERVICES (WITHIN THE LAST THIRTY DAYS OF LIFE), AND THOSE WITH NO RECORD  
OF PALLIATIVE CARE SERVICES

| <i>EOL care metric</i>              | <i>No billed PC services</i> | <i>Billed PC services within last 30 days of life</i> |
|-------------------------------------|------------------------------|-------------------------------------------------------|
| <i>N</i>                            | 114,287                      | 4,441                                                 |
| Death on hospice, %                 | 47                           | 47                                                    |
| Days on hospice, median (IQR)       | 10 (3–29)                    | 4 (2–8)                                               |
| >3 Days on hospice, %               | 74                           | 53                                                    |
| >1 ED visit, last 30 days, %        | 13                           | 22                                                    |
| >1 hospitalization, last 30 days, % | 14                           | 22                                                    |
| ICU admission, last 30 days, %      | 36                           | 58                                                    |
| Inpatient death, %                  | 38                           | 47                                                    |
| Chemotherapy use, last 14 days, %   | 7                            | 9                                                     |

EOL, end-of-life; PC, palliative care; ED, emergency department; ICU, intensive care unit; IQR, interquartile range.
